# Supplementary material for: Understanding the structural disorganization of starch in water–ionic liquid solutions
Source: Royal Society of Chemistry journal article supplement (doi:10.1039/c5cp01176k), 2015-01-01
Supplement: c5cp01176k1.pdf [file c5cp01176k1.pdf]

**Table S1** The formulations, in mass and in mole, used in the experimental work

| Mass ratio |                           |        | Mole ratio |                           |            |
|------------|---------------------------|--------|------------|---------------------------|------------|
| Water      | [C <sub>2</sub> mim][OAc] | Starch | Water      | [C <sub>2</sub> mim][OAc] | Starch –OH |
| 10         | 0                         | 1      | 100.77     | 0                         | 2.91       |
| 9          | 1                         | 1      | 90.83      | 1                         | 2.91       |
| 7          | 3                         | 1      | 23.65      | 1                         | 0.97       |
| 5          | 5                         | 1      | 10.21      | 1                         | 0.58       |

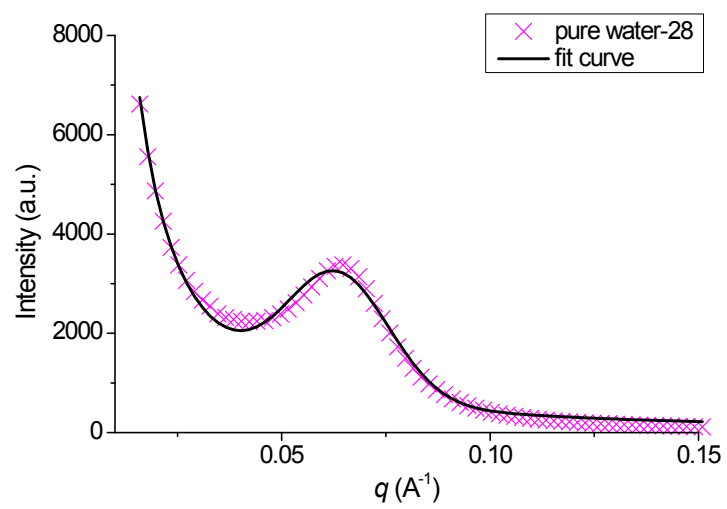

**Fig. S1** SAXS patterns and their fit curves of the starch samples at 28 °C in pure water.

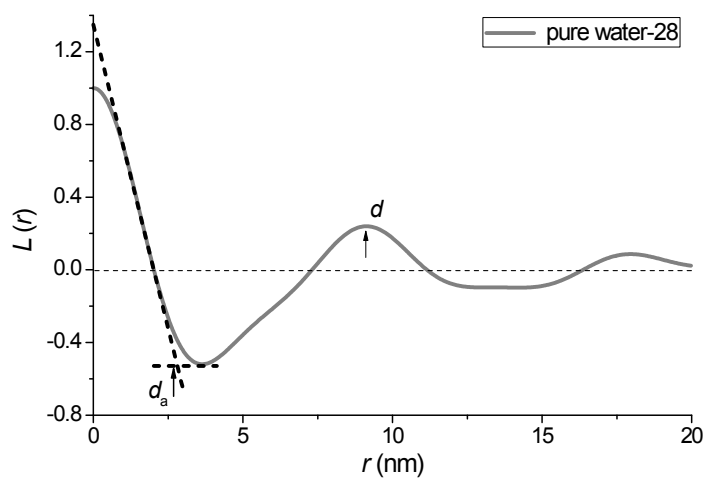

**Fig. S2** Linear correlation function of the starch in pure water at 28 °C.  $d$  and  $d_a$  are the thicknesses of the semicrystalline lamellae and of the crystalline lamellae, respectively.
